# Supplementary material
Source: publisher figshare collection journal article supplement (https://asha.figshare.com/articles/dataset/_/26824960)
Supplement: Supplementary file 1 [file 2]

## Supplemental Material S1. Demographic questionnaire.

Gender: \_\_\_\_\_ Male \_\_\_\_\_ Female \_\_\_\_\_ Non-Binary \_\_\_\_\_ Prefer not to say

### *Please specify your race/ethnicity:*

\_\_\_\_\_ Caucasian/White  
\_\_\_\_\_ African American/Black  
\_\_\_\_\_ Hispanic/Latino/a  
\_\_\_\_\_ Asian  
\_\_\_\_\_ Middle Eastern  
\_\_\_\_\_ Pacific Islander  
\_\_\_\_\_ Native American/Alaskan  
\_\_\_\_\_ Other, please specify: \_\_\_\_\_

Is there any other information you would like to provide regarding your racial/ethnic background?

\_\_\_\_\_  
\_\_\_\_\_

### *Location*

Nationality \_\_\_\_\_ American  
\_\_\_\_\_ Other, please specify: \_\_\_\_\_  
Born U.S. citizen? \_\_\_\_\_ Yes \_\_\_\_\_ No

### *Languages*

Native/First Language Spoken: \_\_\_\_\_  
Languages spoken in the childhood home: \_\_\_\_\_  
Are you bilingual? \_\_\_\_ Yes \_\_\_\_\_ No  
Languages spoken currently: \_\_\_\_\_  
Is there any other information you would like to provide regarding your language background?

\_\_\_\_\_  
\_\_\_\_\_

### *Education/Certification*

Highest Level of Education Achieved:  
\_\_\_\_\_ Bachelor's Degree Area: \_\_\_\_\_  
\_\_\_\_\_ Master's Degree Area: \_\_\_\_\_  
\_\_\_\_\_ Doctoral Degree Area: \_\_\_\_\_

Speech-Language Pathology years of experience \_\_\_\_\_

School-Based Speech Pathology years of experience \_\_\_\_\_
