# Supplementary material
Source: publisher figshare collection journal article supplement (https://asha.figshare.com/articles/dataset/_/26824960)

# Cultural Humility Mind Map

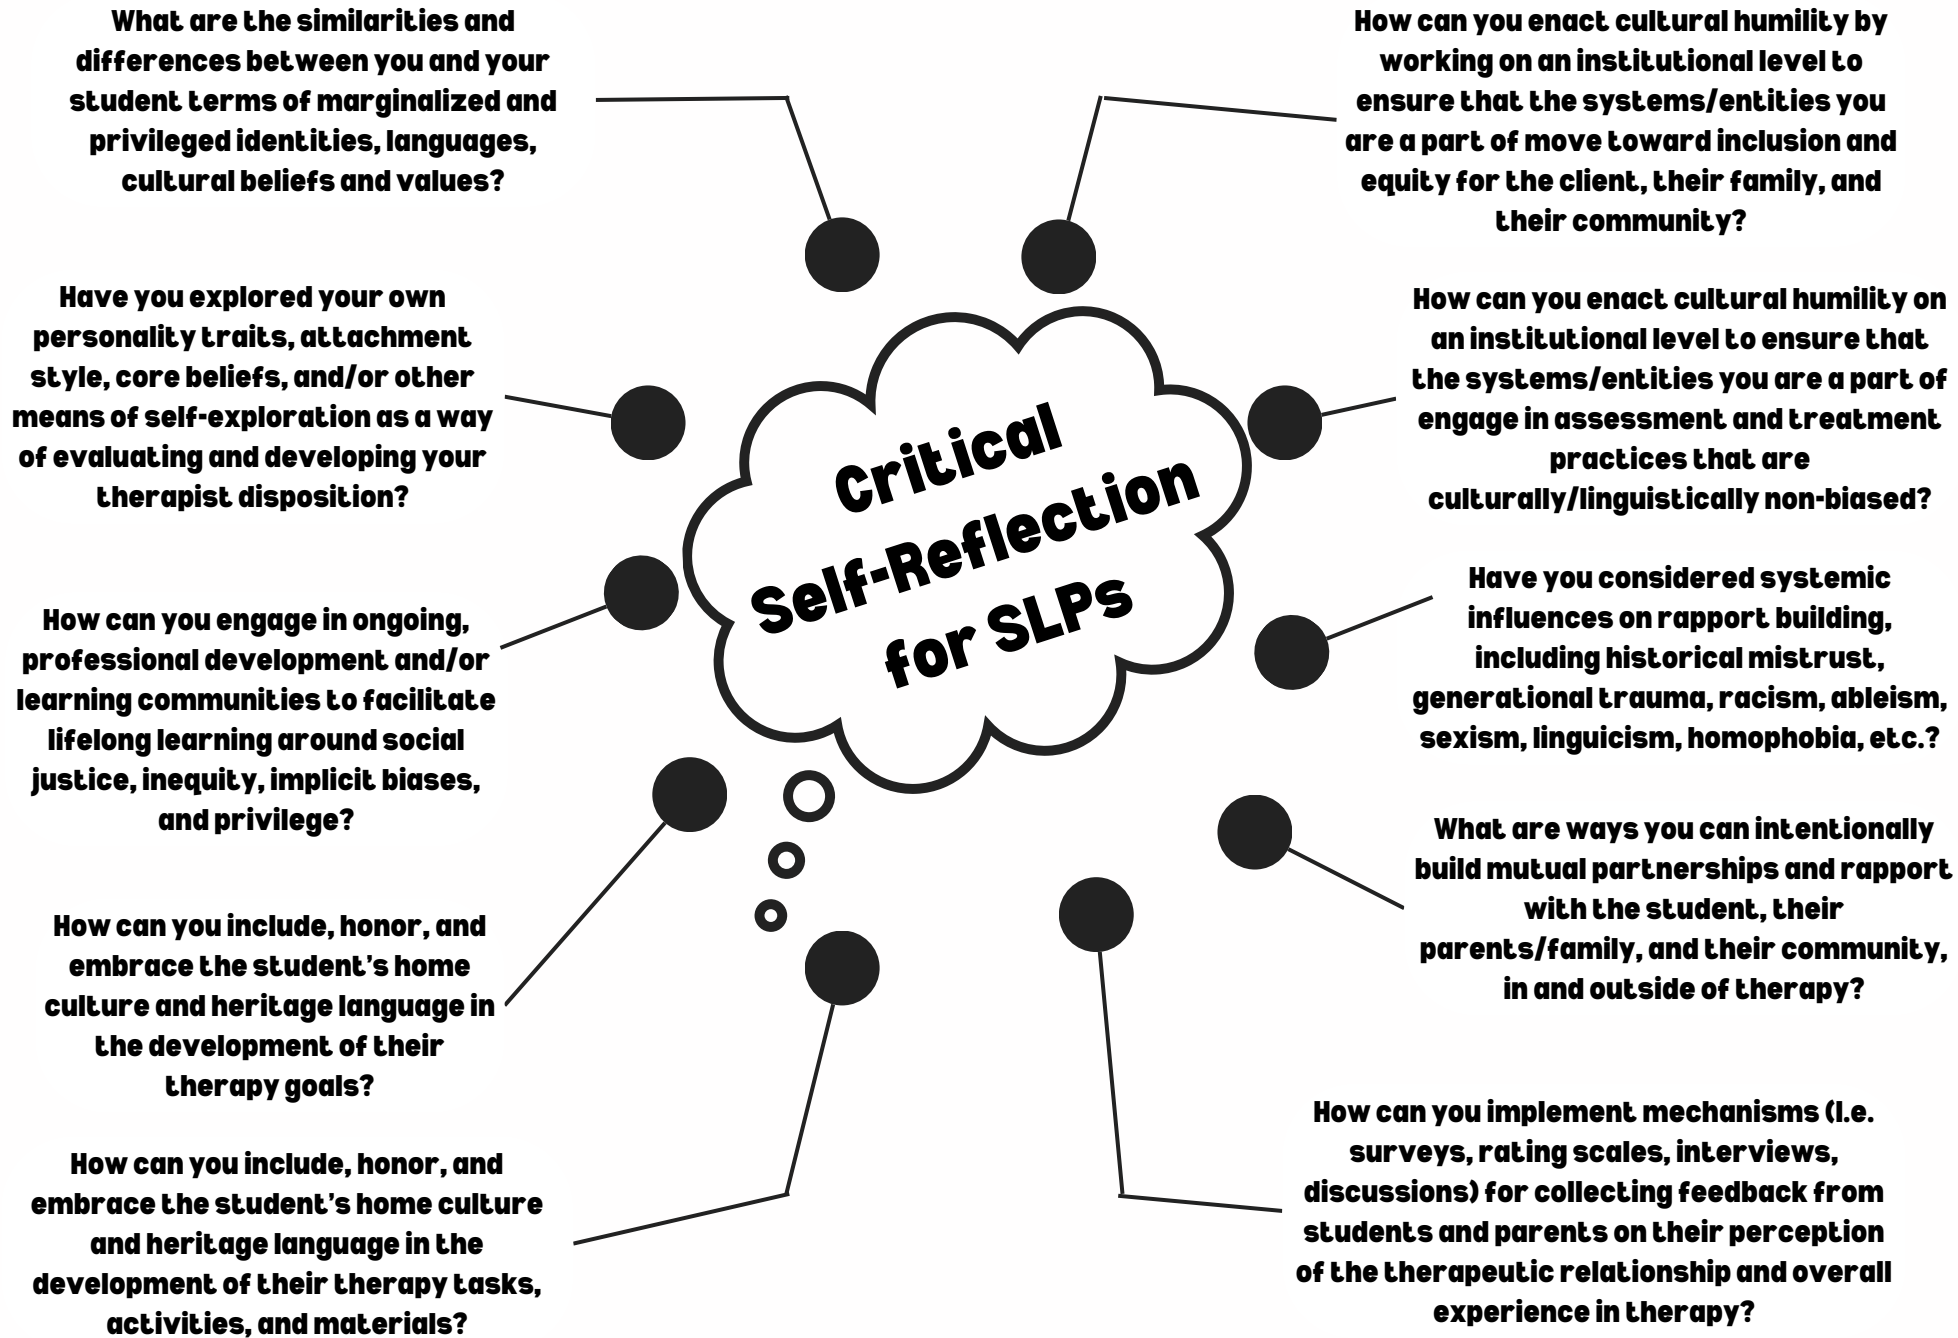

Supplement: Supplementary file 4 [file 2]
